# Supplementary material for: Environmental Impacts of the Brazilian Egg Industry: Life Cycle Assessment of the Battery Cage Production System
Source: MDPI journal article supplement (doi:10.3390/ani14060861), 2024-03-11
Supplement: s1 [file s1]

Supplementary Information

Supplementary S1

Table S1: Calculation of nitrogen emissions, methane, and phosphorus losses, considering the functional unit of 1000 hens produced in cages.

|                                                                                                                                                                            |                 |                         |
|----------------------------------------------------------------------------------------------------------------------------------------------------------------------------|-----------------|-------------------------|
| Number of hens                                                                                                                                                             |                 | 1025.00                 |
| Excreted N (kg)                                                                                                                                                            |                 | 162.06                  |
| Excreted P(kg)                                                                                                                                                             |                 | 33.29                   |
| Estimates of nitrogen emissions                                                                                                                                            |                 |                         |
| Description of emissions                                                                                                                                                   | Emission factor | Emitted N               |
| Direct emissions of N <sub>2</sub> O from manure management<br>((kg N <sub>2</sub> O-N (kg N)-1)                                                                           | 0.005           | 1.27                    |
| Volatilization of N as NH <sub>3</sub> and NO <sub>x</sub><br>((kg NH <sub>3</sub> -N + NO <sub>x</sub> -N) (kg N)-1))                                                     | 0.21            | 34.03                   |
| Indirect emissions of N <sub>2</sub> O due to NH <sub>3</sub> /NO <sub>x</sub> volatilization<br>((kg N <sub>2</sub> O-N) (kg NH <sub>3</sub> -N + NO <sub>x</sub> -N)-1)) | 0.01            | 0.53                    |
| Leaching of NO <sub>3</sub><br>(kg N (kg N)-1)                                                                                                                             | 0.24            | 38.89                   |
| Indirect emissions of N <sub>2</sub> O due to leaching<br>(kg N <sub>2</sub> O-N (kg N)-1)                                                                                 | 0.011           | 0.67                    |
|                                                                                                                                                                            |                 |                         |
| Description of emissions                                                                                                                                                   | Emission factor | Emitted N               |
| Direct emissions of N <sub>2</sub> O after application to the soil<br>((kg N <sub>2</sub> O-N (kg N)-1)                                                                    | 0.01            | 1.61                    |
| Volatilization of N as NH <sub>3</sub> and NO <sub>x</sub> after application to the soil<br>((kg NH <sub>3</sub> -N + NO <sub>x</sub> -N) (kg N)-1))                       | 0.21            | 26.89                   |
| Indirect emissions of N <sub>2</sub> O due to NH <sub>3</sub> /NO <sub>x</sub> volatilization<br>((kg N <sub>2</sub> O-N) (kg NH <sub>3</sub> -N + NO <sub>x</sub> -N)-1)) | 0.01            | 0.34                    |
| Leaching of NO <sub>3</sub> in the soil<br>(kg N (kg N)-1)                                                                                                                 | 0.24            | 29.56                   |
| Indirect emissions of N <sub>2</sub> O due to leaching<br>(kg N <sub>2</sub> O-N (kg N)-1)                                                                                 | 0.011           | 0.43                    |
|                                                                                                                                                                            |                 |                         |
| Total N <sub>2</sub> O (kg)                                                                                                                                                |                 | 4.85                    |
| Total NO <sub>3</sub> (kg)                                                                                                                                                 |                 | 68.45                   |
| Total NH <sub>3</sub> (kg)                                                                                                                                                 |                 | 48.92                   |
| Total NO <sub>x</sub> (kg)                                                                                                                                                 |                 | 12.00                   |
| Estimates of methane emissions                                                                                                                                             |                 |                         |
| Emissions description                                                                                                                                                      | Emission factor | Emitted CH <sub>4</sub> |
| CH <sub>4</sub> (kg)                                                                                                                                                       | 10.5            | 27.01                   |
| Estimates of phosphorus losses                                                                                                                                             |                 |                         |
| Emissions description                                                                                                                                                      | Emission factor | Emitted P               |
| P <sub>2</sub> O <sub>5</sub> (kg)                                                                                                                                         | 0.03485         | 3.56                    |

Table S2. Calculation of nitrogen emissions, methane, and phosphorus losses, considering the functional unit of one ton of eggs produced.

|                                                                                                                                                                            |                  |                         |
|----------------------------------------------------------------------------------------------------------------------------------------------------------------------------|------------------|-------------------------|
| Number of hens                                                                                                                                                             |                  | 55.73                   |
| Excreted N (kg)                                                                                                                                                            |                  | 57.80                   |
| Lost P (kg)                                                                                                                                                                |                  | 11.36                   |
| Estimates of nitrogen emissions                                                                                                                                            |                  |                         |
| Emissions description                                                                                                                                                      | Emission factor  | Emitted N               |
| Direct emissions of N <sub>2</sub> O from manure management<br>((kg N <sub>2</sub> O-N (kg N)-1)                                                                           | 0.005            | 0.45                    |
| Volatilization of N as NH <sub>3</sub> and NO <sub>x</sub><br>((kg NH <sub>3</sub> -N + NO <sub>x</sub> -N) (kg N)-1))                                                     | 0.21             | 12.14                   |
| Indirect emissions of N <sub>2</sub> O due to NH <sub>3</sub> /NO <sub>x</sub> volatilization<br>((kg N <sub>2</sub> O-N) (kg NH <sub>3</sub> -N + NO <sub>x</sub> -N)-1)) | 0.01             | 0.19                    |
| Leaching of NO <sub>3</sub><br>(kg N (kg N)-1)                                                                                                                             | 0.24             | 13.87                   |
| Indirect emissions of N <sub>2</sub> O due to leaching<br>(kg N <sub>2</sub> O-N (kg N)-1)                                                                                 | 0.011            | 0.24                    |
|                                                                                                                                                                            |                  |                         |
| Emissions description                                                                                                                                                      | Emission factor  | Emitted N               |
| Direct emissions of N <sub>2</sub> O after soil application<br>((kg N <sub>2</sub> O-N (kg N)-1)                                                                           | 0.01             | 0.75                    |
| Volatilization of N as NH <sub>3</sub> and NO <sub>x</sub> after soil application<br>((kg NH <sub>3</sub> -N + NO <sub>x</sub> -N) (kg N)-1))                              | 0.21             | 15.78                   |
| Indirect emissions of N <sub>2</sub> O due to NH <sub>3</sub> /NO <sub>x</sub> volatilization<br>((kg N <sub>2</sub> O-N) (kg NH <sub>3</sub> -N + NO <sub>x</sub> -N)-1)) | 0.01             | 0.16                    |
| Leaching of NO <sub>3</sub> in the soil<br>(kg N (kg N)-1)                                                                                                                 | 0.24             | 18.03                   |
| Indirect N <sub>2</sub> O emissions due to leaching<br>(kg N <sub>2</sub> O-N (kg N)-1)                                                                                    | 0.011            | 0.20                    |
|                                                                                                                                                                            |                  |                         |
| Total N <sub>2</sub> O (kg)                                                                                                                                                |                  | 1.99                    |
| Total NO <sub>3</sub> (kg)                                                                                                                                                 |                  | 31.91                   |
| Total NH <sub>3</sub> (kg)                                                                                                                                                 |                  | 22.42                   |
| Total NO <sub>x</sub> (kg)                                                                                                                                                 |                  | 5.50                    |
| Estimates of methane emissions                                                                                                                                             |                  |                         |
| Emissions description                                                                                                                                                      | Emissions factor | Emitted CH <sub>4</sub> |
| CH <sub>4</sub> (kg)                                                                                                                                                       | 10.5             | 3.18                    |
| Estimates of phosphorus emissions                                                                                                                                          |                  |                         |
| Emissions description                                                                                                                                                      | Emission factor  | Emitted P               |
| P <sub>2</sub> O <sub>5</sub> (kg)                                                                                                                                         | 0.03485          | 1.21                    |

## Supplementary S2

Table S3: Compositions of the feeds for the Pullets houses

| Ingredients         | Pre-starter Feed | Starter Feed | Grower Feed | Maturity Feed | Pre-laying Feed |
|---------------------|------------------|--------------|-------------|---------------|-----------------|
| Maize               | 648.062          | 661.132      | 661.912     | 647.677       | 645.059         |
| Soybean meal        | 240.849          | 206.528      | 196.788     | 176.726       | 194.710         |
| Soybean hull        | 45.405           | 65.336       | 77.144      | 115.491       | 59.131          |
| Limestone           | 6.205            | 9.063        | 12.954      | 12.333        | 51.167          |
| Meat and Bone Meal  | 42.447           | 41.686       | 37.956      | 38.680        | 39.876          |
| Methionine          | 3.987            | 3.711        | 2.837       | 1.257         | 2.502           |
| Salt                | 3.500            | 3.500        | 3.500       | 3.500         | 3.500           |
| Mineral and vitamin | 3.000            | 3.000        | 3.000       | 3.000         | 2.000           |
| Lysine              | 2.955            | 2.642        | 1.544       |               | 0.343           |
| Threonine           | 1.376            | 1.117        | 0.961       | 0.036         | 0.223           |
| Vitamins D          | 1.000            | 1.000        | 0.250       | 0.250         | 0.250           |
| Enzymes             | 0.500            | 0.500        | 0.500       | 0.500         | 0.500           |
| Organic acid        | 0.400            | 0.400        | 0.400       | 0.400         | 0.400           |
| Tryptophan          | 0.214            | 0.285        | 0.104       |               | 0.239           |
| Probiotic           | 0.100            | 0.100        | 0.150       | 0.150         | 0.100           |

Total quantity of 14,435.11 tons of feed produced for pullets in 2021.

Table S4: Compositions of the feeds for the Laying houses

| Ingredients         | Starter Feed | Peak Feed | Laying Feed 1 | Laying Feed 2 | Laying Feed 3 |
|---------------------|--------------|-----------|---------------|---------------|---------------|
| Maize               | 602.221      | 622.461   | 626.634       | 633.372       | 624.566       |
| Soybean meal        | 174.642      | 151.460   | 147.150       | 136.581       | 133.616       |
| Limestone           | 93.156       | 94.523    | 102.652       | 108.835       | 106.486       |
| DDG                 | 80.000       | 80.000    | 80.000        | 80.000        | 80.000        |
| Meat and Bone Meal  | 32.044       | 27.502    | 17.564        | 14.497        | 11.355        |
| Soybean hull        | -            | 9.947     | 15.023        | 15.601        | 24.484        |
| Seaweed             | -            | -         | -             | -             | 10.000        |
| Vegetable oil       | 5.349        |           |               |               |               |
| Methionine          | 2.676        | 2.747     | 1.665         | 1.460         | 1.073         |
| Sodium Sulfate      | 2.000        | 2.500     | 2.500         | 2.500         | 2.500         |
| Salt                | 2.000        | 2.000     | 2.000         | 2.000         | 2.000         |
| Mineral and vitamin | 2.000        | 2.000     | 2.000         | 2.000         | 2.000         |
| Lysine              | 1.278        | 1.906     | 0.616         | 0.664         | 0.476         |
| Mycotoxin Adsorbent | 1.000        | 1.000     | 1.000         | 1.000         |               |
| Threonine           | 0.460        | 0.688     | -             | -             | -             |
| Choline chloride    | 0.500        | 0.500     | 0.500         | 0.500         | 0.500         |
| Enzyme Bland        | 0.500        | 0.500     | 0.500         | 0.500         | 0.500         |
| Tryptophan          | 0.174        | 0.266     | 0.196         | 0.240         | 0.194         |
| Vitamin D           | -            | -         | -             | 0.250         | 0.250         |

Total quantity of 157,267.89 tons of feed produced for laying hens in 2021.

### Supplementary S3

Table S5: Data quality criteria and rating system: ecoinvent pedigree matrix.

|                                          | 1                                                                                                                               | 2                                                                                                                                      | 3                                                                                                                             | 4                                                                                                                  | 5                                                                                                                    |
|------------------------------------------|---------------------------------------------------------------------------------------------------------------------------------|----------------------------------------------------------------------------------------------------------------------------------------|-------------------------------------------------------------------------------------------------------------------------------|--------------------------------------------------------------------------------------------------------------------|----------------------------------------------------------------------------------------------------------------------|
| <b>Reliability</b>                       | Verified data based on measurements                                                                                             | Verified data partly based on assumptions or non-verified data based on measurements                                                   | Non-verified data partly based on qualified estimates                                                                         | Qualified estimates (e.g. by industrial expert)                                                                    | Non-qualified estimates                                                                                              |
| <b>Completeness</b>                      | Representative data from all sites relevant for the market considered, over and adequate period to even out normal fluctuations | Representative data from >50% of the sites relevant for the market considered, over an adequate period to even out normal fluctuations | Representative data from only some sites (<50%) relevant for the market considered, or >50% of sites but from shorter periods | Representative data from only one sites relevant for the market considered, or some sites but from shorter periods | Representativeness unknown or data from a small number of sites and from shorter periods                             |
| <b>Temporal correlation</b>              | Less than 3 years of difference to the time period of the data set                                                              | Less than 6 years of difference to the time period of the data set                                                                     | Less than 10 years of difference to the time period of the data set                                                           | Less than 15 years of difference to the time period of the data set                                                | Age of data unknown or more than 15 years of difference to the time period of the data set                           |
| <b>Geographical correlation</b>          | Data from area under study                                                                                                      | Average data from larger area in which the area under study is included                                                                | Data from area with similar production conditions                                                                             | Data from area with similar production conditions                                                                  | Data from unknown or distinctly different area (North America instead of Middle East, OECD-Europe instead of Russia) |
| <b>Further technological correlation</b> | Data from enterprises processes and materials under study                                                                       | Data from processes and materials under study (i.e. identical technology) but from different enterprises                               | Data from processes and materials under study but from different technology                                                   | Data on related processes and materials                                                                            | Data on related processes on laboratory scale or from different technology                                           |

Source: Ciroth et al. [1].

# Supplementary S4

Table S6: Data quality assessment: ecoinvent pedigree matrix.

| Life cycle stage                    | Data                                       | R | C | T | G | F |
|-------------------------------------|--------------------------------------------|---|---|---|---|---|
| Feed Production                     | Feed composition                           | 1 | 1 | 1 | 1 | 1 |
|                                     | Direct energy use                          | 1 | 1 | 1 | 1 | 1 |
|                                     | Material and energy inputs                 | 1 | 2 | 1 | 2 | 2 |
| Pullet Facilities                   | Feed Composition                           | 1 | 1 | 1 | 1 | 1 |
|                                     | Material and energy Inputs                 | 1 | 1 | 1 | 1 | 1 |
|                                     | Manure management                          | 2 | 3 | 1 | 2 | 1 |
|                                     | Mortalities                                | 2 | 2 | 1 | 2 | 1 |
| Layer Facilities                    | Feed Composition                           | 1 | 1 | 1 | 1 | 1 |
|                                     | Material and energy Inputs                 | 1 | 1 | 1 | 1 | 1 |
|                                     | Manure management                          | 2 | 3 | 1 | 2 | 1 |
|                                     | Mortalities                                | 2 | 2 | 1 | 2 | 1 |
| Washing & Grading                   | Material and energy inputs                 | 2 | 2 | 1 | 2 | 1 |
| Egg Breaking and Further Processing | Material and energy inputs                 | 2 | 2 | 1 | 2 | 2 |
| Transportation                      | Transportation distances (foreground data) | 1 | 1 | 1 | 1 | 1 |

The abbreviations for the columns are **R**eliability, **C**ompleteness, **T**emporal correlation, **G**eographical correlation, **F**urther technical correlation as defined in the data quality scheme, according to Ciroth et al. [1].

## REFERENCE

1.      Ciroth, A.; Noi, C.; Lohse, T.; Srocka, M. OpenLCA 1.10 - Comprehensive User Manual. 2020, 127.  
Available online: [https://www.openlca.org/wp-content/uploads/2020/01/openLCA\\_1.10\\_User-Manual.pdf](https://www.openlca.org/wp-content/uploads/2020/01/openLCA_1.10_User-Manual.pdf).  
(accessed on 1 March 2023)
